# Supplementary material
Source: PubMed Central journal article supplement (PMC8939782)
Supplement: NIHMS1739320-supplement-SDC_1.pdf [file NIHMS1739320-supplement-SDC_1.pdf]

Supplemental Digital Content 1

| <b>Characteristics of Focus Group Respondents</b> |               |
|---------------------------------------------------|---------------|
| <b>Round 1</b>                                    | <b>(n=23)</b> |
| <b>Study Site</b>                                 |               |
| UW                                                | 7             |
| OHSU                                              | 8             |
| UTSW                                              | 8             |
| <b>Roles: n (%)</b>                               |               |
| Trauma Surgeon                                    | 14 (61)       |
| Trauma Fellow                                     | 7 (30)        |
| Neurosurgeon                                      | 2 (9)         |
| <b>Round 2</b>                                    | <b>(n=25)</b> |
| <b>Study Site</b>                                 |               |
| UW                                                | 9             |
| OHSU                                              | 8             |
| UTSW                                              | 8             |
| <b>Roles: n (%)</b>                               |               |
| Trauma Surgeon                                    | 2 (8)         |
| Neurosurgeon                                      | 1 (4)         |
| Orthopedic Surgeon                                | 1 (4)         |
| Nurse                                             | 16 (64)       |
| Social Worker                                     | 3 (12)        |
| Chaplain                                          | 2 (12)        |
| <b>Demographics of Focus Group Respondents</b>    |               |
| Age: <i>median (IQR)</i>                          | 35 (25-57)    |
| Male gender: <i>n (%)</i>                         | 24 (50)       |
| English primary language: <i>n (%)</i>            | 38 (79)       |
| White race: <i>n (%)</i>                          | 38 (79)       |
| Years in practice: <i>median (IQR)</i>            | 7 (2-19)      |
| Years at study site: <i>median (IQR)</i>          | 3 (1-13)      |
