# Supplementary material
Source: PubMed Central journal article supplement (PMC8939782)
Supplement: NIHMS1739320-supplement-SDC_4.pdf [file NIHMS1739320-supplement-SDC_4.pdf]

Supplemental Digital Content 4

| <b>Assessment Questions for Instructors and Learners for Best Case/Worst Case Trauma ICU Training</b> |
|-------------------------------------------------------------------------------------------------------|
| Please rate the learner's/your ability to do the following:                                           |
| Complete the information on the BC/WC graphic aid on rounds                                           |
| Tell a story about the Best Case Scenario for your patients                                           |
| Use GTOS to help generate plausible stories for patients                                              |
| Identify pertinent events during the patient's ICU course to update the graphic aid                   |
| Talk with family members/patients using the graphic aid                                               |
| Begin to transition to the BC/WC Acute Decision tool if appropriate                                   |

5-point Likert scale: 1 = cannot do this independently, 3 = could do this with prompting or assistance, 5 = able to do this independently without prompting
