# Supplementary material
Source: PubMed Central journal article supplement (PMC8939782)
Supplement: NIHMS1739320-supplement-SDC_5.pdf [file NIHMS1739320-supplement-SDC_5.pdf]

# Supplemental Digital Content 5

## Brochure Describing the Best Case/Worst Case Trauma ICU Intervention, Provided to Trauma Team Members

**"Patients don't need more information, they need more interpretation of the information we give them"**

*-Sharon Kaufman  
Author of Ordinary Medicine*

**The Graphic Aid**

The graphic aid shows the trajectory of the patient's condition over the course of their ICU stay. The star indicates the Best Case Scenario for the patient, the square indicates the Worst Case Scenario. Sometimes when the trauma surgeon is talking with a patient/family they will feel it is helpful to make an oval, to show what they think is most likely.

Graphic aid for a patient with a long ICU stay. If there is an important event, this is noted, then the team writes the story about what things would look like if everything went well, and places the star. The Worst Case often stays the same.

**For More Information**

**Oregon Health Sciences University**  
Site PI: Karen Brasel, MD  
brasel@ohsu.edu

**University of Texas Southwestern**  
Site PI: Herb Phelan, MD  
Herb.Phelan@UTSouthwestern.edu

**University of Wisconsin**  
Project PI: Gretchen Schwarze, MD, MPP  
schwarze@surgery.wisc.edu

For more info on BC/WC, watch this video:

[www.youtube.com/watch?v=Fns3K44sbuo](http://www.youtube.com/watch?v=Fns3K44sbuo)

Visit us on the web:

[www.surgery.wisc.edu/research/researchers-labs/the-patient-preferences-project/](http://www.surgery.wisc.edu/research/researchers-labs/the-patient-preferences-project/)

**Best Case / Worst Case in the Trauma ICU**

Best Case/Worst Case is a tool designed to help patients, families, and care team members understand serious illness in order to help them make the best decisions along the way.

**Creating BC/WC on Rounds**

The trauma team will determine what the Best Case Scenario is each day on rounds.

When they present the patient by systems, they will note the patient's OUTLOOK. This is the patient's Geriatric Trauma Outcome Score, which estimates mortality and discharge to SNF, LTAC, or Hospice. In turn, the trauma surgeon will then translate the score into a story about what we can expect for this patient if everything goes well. Members of the team will write the story onto the graphic aid and mark the star.

Watch a video of the team using the tool on rounds:

<https://www.youtube.com/watch?v=93h8zvt4Xg>

**Using BC/WC with Patients and Families**

Anyone can ask the patient or family to fill out the back side:

This can include anything the patient likes to spend time doing. The graphic aid can be posted in the patient's room to remind the team to fill it out the next day and give the family a nice reminder of what their loved one enjoys.

**Using BC/WC to Make a Decision**

The BC/WC tool can be used to discuss treatment options when there is a major treatment decision to make. Stories about the Best, Worst, and Most Likely case for each option are discussed with the patient and family, allowing them to consider these plausible futures and the patient's wishes in order to talk with the team about what is important to them and what treatment burdens or outcomes they want to avoid.
