# Supplementary material
Source: PubMed Central journal article supplement (PMC8939782)
Supplement: NIHMS1739320-supplement-SDC_6.pdf [file NIHMS1739320-supplement-SDC_6.pdf]

## Supplemental Digital Content 6

| <b>Family Participant Characteristics</b>                   | <b>Intervention (n=38)</b> | <b>Control (n=48)</b> |
|-------------------------------------------------------------|----------------------------|-----------------------|
| <b>Age in years: mean (sd)</b>                              | 64 (13)                    | 61 (13)               |
| <b>Male gender: n (%)</b>                                   | 10 (26)                    | 10 (21)               |
| <b>Race/ethnicity (self-reported): n (%)</b>                |                            |                       |
| White or Caucasian                                          | 33 (87)                    | 29 (61)               |
| Black or African American                                   | 1 (3)                      | 1 (2)                 |
| Asian                                                       | 1 (3)                      | 0 (0)                 |
| American Indian or Alaskan Native                           | 3 (8)                      | 3 (6)                 |
| More than one race                                          | 0 (0)                      | 4 (8)                 |
| Unknown or No response                                      | 0 (0)                      | 11 (23)               |
| <b>Hispanic, Latino, or Spanish origin: n (%)</b>           |                            |                       |
| Hispanic                                                    | 2 (5)                      | 4 (8)                 |
| Not Hispanic                                                | 36 (95)                    | 32 (67)               |
| Unknown or No response                                      | 0 (0)                      | 12 (25)               |
| <b>Educational attainment: n (%)</b>                        |                            |                       |
| Some High School or Less                                    | 1 (3)                      | 0 (0)                 |
| High School Diploma or GED                                  | 10 (26)                    | 4 (11)                |
| College Degree                                              | 8 (21)                     | 17 (35)               |
| Graduate School Degree or Higher                            | 4 (11)                     | 6 (13)                |
| Unknown                                                     | 15 (40)                    | 21 (44)               |
| <b>Relationship with the patient you accompanied: n (%)</b> |                            |                       |
| Spouse or partner                                           | 17 (46)                    | 17 (35)               |
| Child (daughter or son of participant)                      | 12 (32)                    | 20 (42)               |
| Grandchild                                                  | 1 (3)                      | 1 (2)                 |
| Friend                                                      | 0 (0)                      | 2 (4)                 |
| Other                                                       | 8 (21)                     | 7 (15)                |
| Unknown                                                     | 0 (0)                      | 1 (2)                 |
