# Supplementary material
Source: PubMed Central journal article supplement (PMC8939782)
Supplement: NIHMS1739320-supplement-SDC_7.pdf [file NIHMS1739320-supplement-SDC_7.pdf]

Supplemental Digital Content 7

| <b>Receipt of Goal Concordant Care as Reported by Family Respondents</b> |                                |                                |         |
|--------------------------------------------------------------------------|--------------------------------|--------------------------------|---------|
|                                                                          | Receiving Goal Concordant Care | Receiving Goal Discordant Care | Missing |
| Intervention                                                             | 16                             | 8                              | 14      |
| Control                                                                  | 15                             | 7                              | 26      |
| Overall                                                                  | 31                             | 15                             | 40      |

Goal concordance was defined as the following:

- If either Q1 or Q2 were missing then goal concordance status (GCS) was set as missing
- If the subject didn't know the answer to Q2 then GCS was set as missing
- If the subject didn't know the answer to Q1 but responded to Q2 then GCS was 'Discordant'
- If the subject responded the same to Q1 & Q2 then GCS was 'Concordant', otherwise is categorized as 'Discordant'
