# Supplementary material
Source: PubMed Central journal article supplement (PMC8939782)
Supplement: NIHMS1739320-supplement-SDC_9.pdf [file NIHMS1739320-supplement-SDC_9.pdf]

Supplemental Digital Content 9

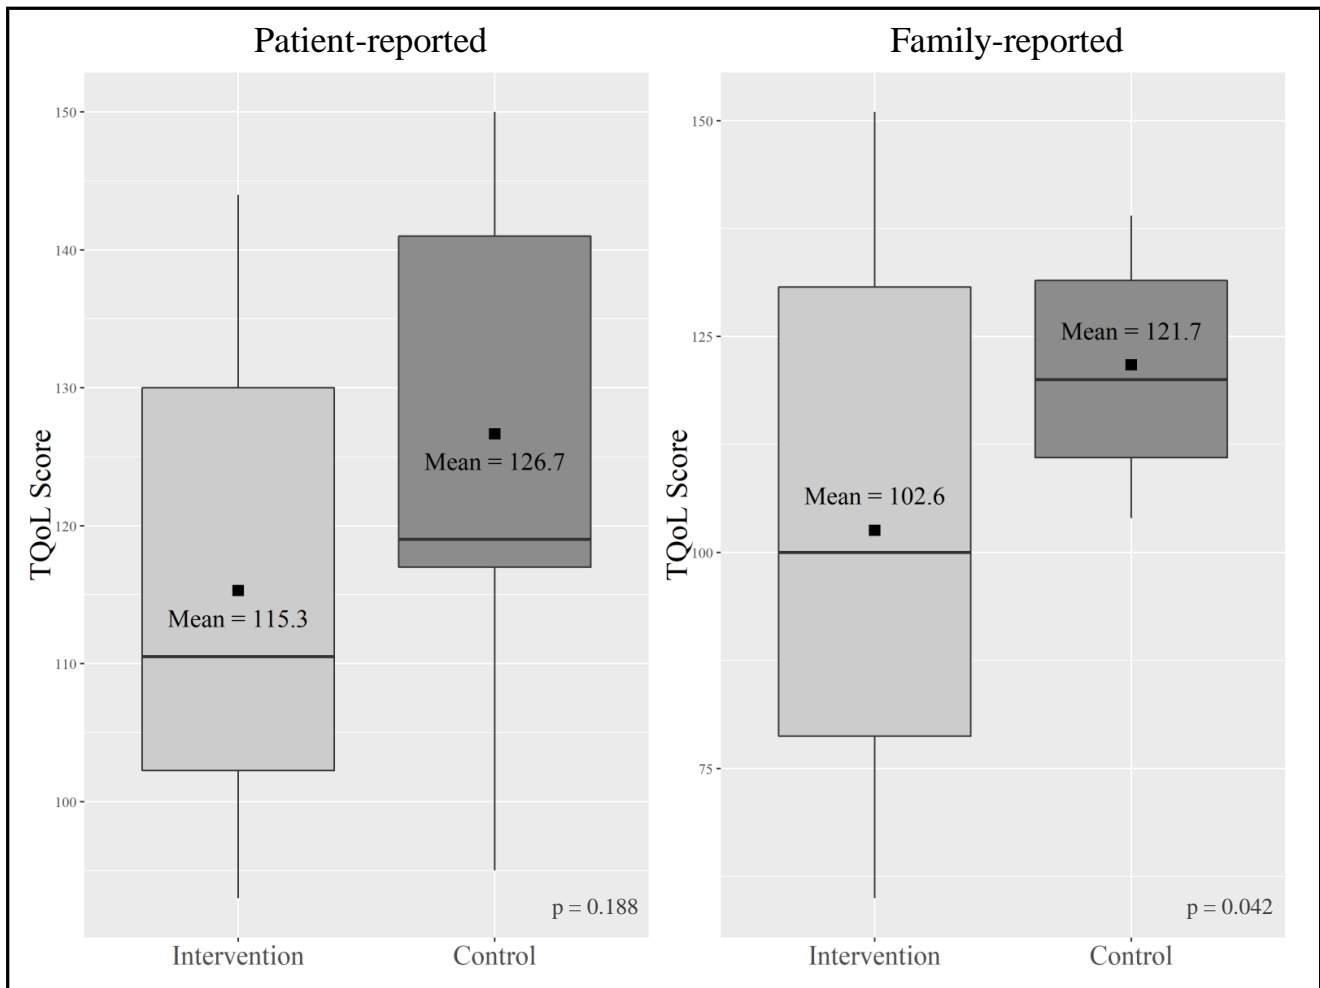

Trauma Quality of Life (TQoL) Scores as Reported by Patients and Family Members (higher scores = better quality of life). Surveys with 2 or more questions not answered were not included in analysis.
