# Supplementary material
Source: PubMed Central journal article supplement (PMC8939782)
Supplement: NIHMS1739320-supplement-SDC_10.pdf [file NIHMS1739320-supplement-SDC_10.pdf]

Supplemental Digital Content 10

| <b>Life Supporting Treatments Received<br/>Between 0- and 10-Days From Admission</b> | <b>Intervention<br/>(n=38)</b> | <b>Control<br/>(n=48)</b> |
|--------------------------------------------------------------------------------------|--------------------------------|---------------------------|
|                                                                                      | <i>n (%)</i>                   | <i>n (%)</i>              |
| None                                                                                 | 20 (53)                        | 24 (50)                   |
| More than one life supporting treatment                                              | 14 (37)                        | 14 (29)                   |
| Mechanical ventilation                                                               | 15 (39)                        | 13 (27)                   |
| Re-intubation                                                                        | 2 (5)                          | 0 (0)                     |
| Tracheostomy                                                                         | 2 (5)                          | 2 (4)                     |
| Feeding tube insertion                                                               | 9 (24)                         | 8 (17)                    |
| Hemodialysis                                                                         | 0 (0)                          | 1 (2)                     |
| Cardiopulmonary resuscitation                                                        | 3 (8)                          | 2 (4)                     |
| Cardiac/vascular catheterization                                                     | 1 (3)                          | 2 (4)                     |
| Drainage tube placement                                                              | 11 (29)                        | 12 (25)                   |
| Total parenteral nutrition initiation                                                | 3 (8)                          | 2 (4)                     |
| Epidural                                                                             | 1 (3)                          | 6 (12)                    |
